# Supplementary material for: Efficacy of the novel CDK7 inhibitor QS1189 in mantle cell lymphoma
Source: PubMed Central journal article supplement (PMC6510728; doi:10.1038/s41598-019-43760-z), 2019-05-10

## Supplementary Information

### Efficacy of the novel CDK7 inhibitor QS1189 in mantle cell lymphoma

Authors: Yun Jung Choi<sup>1</sup>, Dong Ha Kim<sup>1</sup>, Dok Hyun Yoon<sup>2</sup>, Cheolwon Suh<sup>2</sup>, Chang-Min Choi<sup>2,3</sup>, Jae Cheol Lee<sup>3</sup>, Jung Yong Hong<sup>3,\*</sup>, Jin Kyung Rho<sup>4,\*</sup>

#### Affiliations:

<sup>1</sup>Asan Institute for Life Sciences, Asan Medical Center, University of Ulsan, College of Medicine, Seoul 05505, South Korea

<sup>2</sup>Department of Oncology, Asan Medical Center, University of Ulsan, College of Medicine, Seoul 05505, South Korea

<sup>3</sup>Department of Pulmonology and Critical Care Medicine, Asan Medical Center, University of Ulsan, College of Medicine, Seoul 05505, South Korea

<sup>4</sup>Department of Convergence Medicine, Asan Medical Center, University of Ulsan, College of Medicine, Seoul 05505, South Korea

\*Corresponding authors:

Jung Yong Hong

Department of Oncology, University of Ulsan College of Medicine, 88, Olympic-ro 43-gil, Songpa-gu, Seoul 05505, South Korea. Tel: +82 2 3205 3208; Fax: +82 2 3010 6961; E-mail: hongjungyong@gmail.com

Jin Kyung Rho

Department of Convergence Medicine, University of Ulsan College of Medicine, 88,

Olympic-ro 43-gil, Songpa-gu, Seoul 05505, South Korea. Tel: +82 2 3010 2974; Fax: +82 2 3010 6961; E-mail: [jkrho@amc.seoul.kr](mailto:jkrho@amc.seoul.kr)

## **Supplemental Methods**

### **Cell-free kinase assay**

A radioisotopic protein kinase assay (<sup>33</sup>PanQinase® Activity Assay, ProQinase GmbH, Freiburg, Germany) was used to measure the kinase activity of protein kinases including a panel of 28 CDK/cyclin complexes formed from 16 CDKs and 15 cyclins.

### **Supplemental table and figure legends**

**Table S1. List of targets profiled in Figure 1**

**Table S2. IC<sub>50</sub> values of CDK/cyclin complexes by QS1189**

**Figure S1. Inhibition of RNAPII CTD phosphorylation by QS1189 treatment**

MCL cells were treated with the indicated dose of QS1189 for 24 h. The indicated protein levels were analysed by immunoblotting.

**Figure S2. GO analysis of G2/M arrest**

RNA sequencing was performed as described in Figure 2. GO analysis of 3-fold upregulated or downregulated genes based on biological processes using DAVID software.

**Figure S3. Modulation of anti-apoptotic protein by QS1189 treatment**

Cells were treated with the indicated doses of QS1189 for 24 h. The indicated protein levels were analysed by immunoblotting.

Supplemental Figure S1

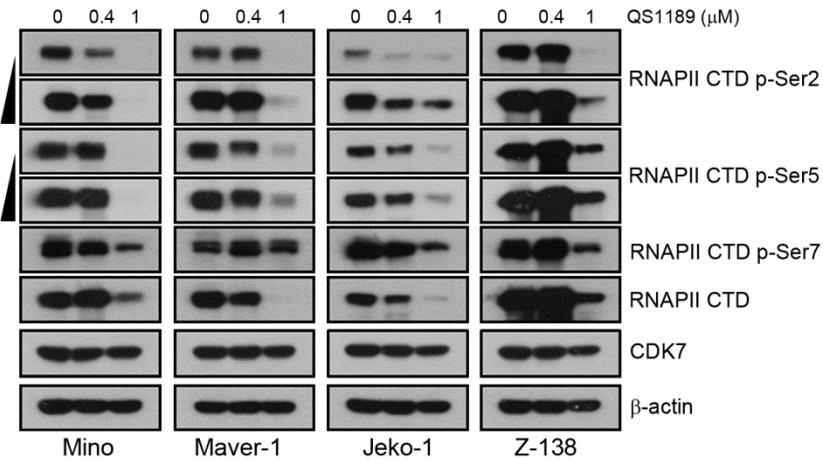

# Supplemental Figure S2

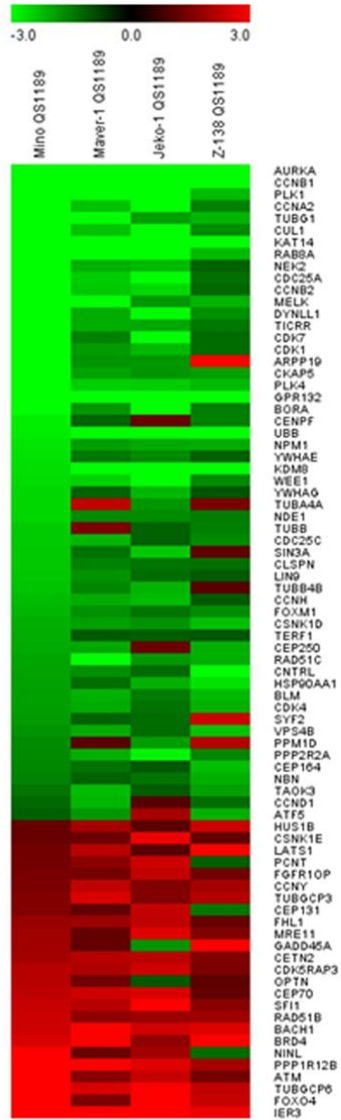

Supplemental Figure S3

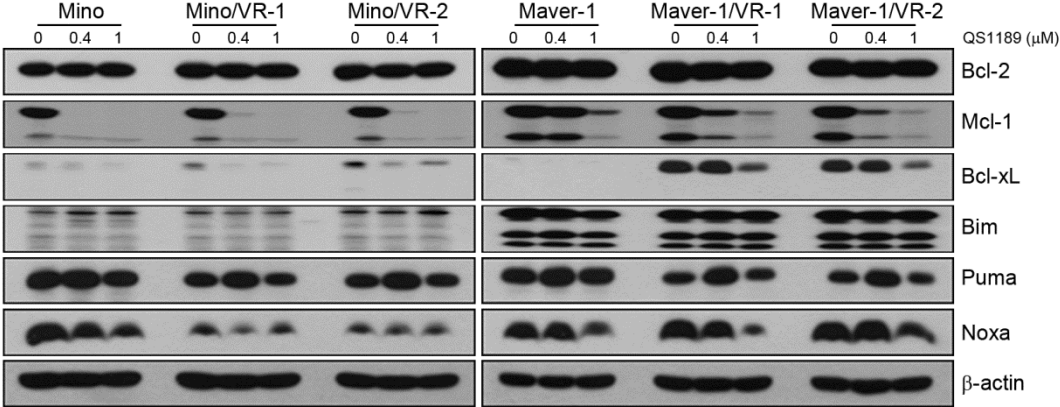

Full blots for figure 1c

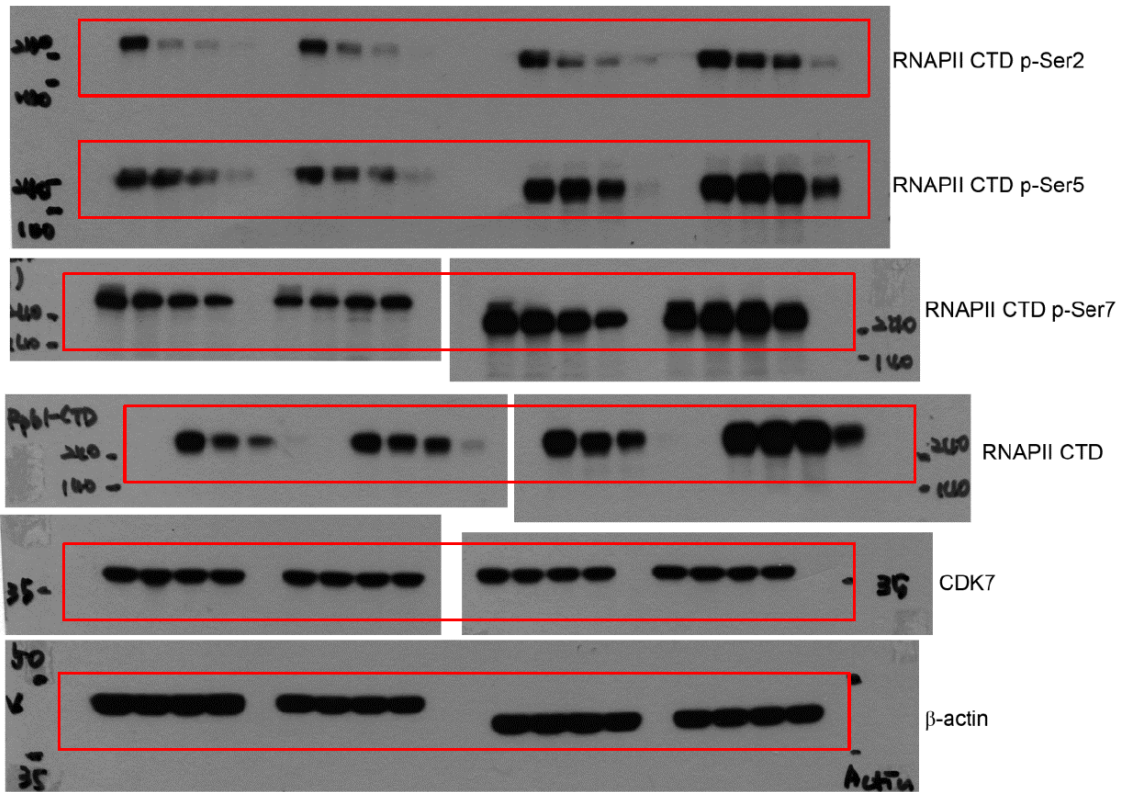

Full blots for figure 3b and d

3b

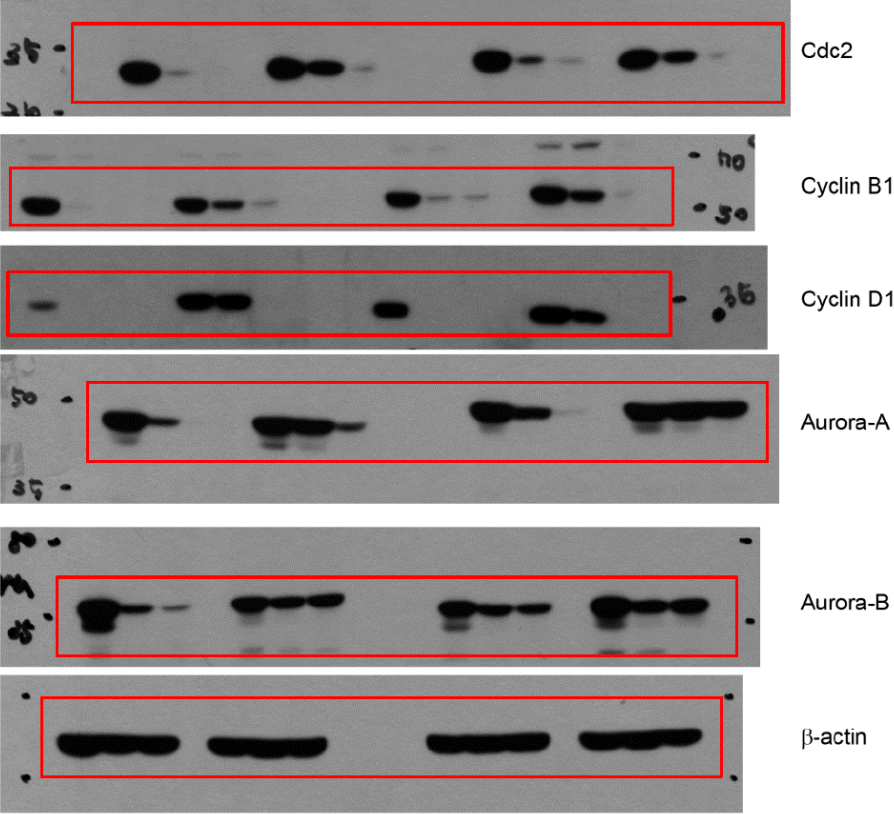

3d

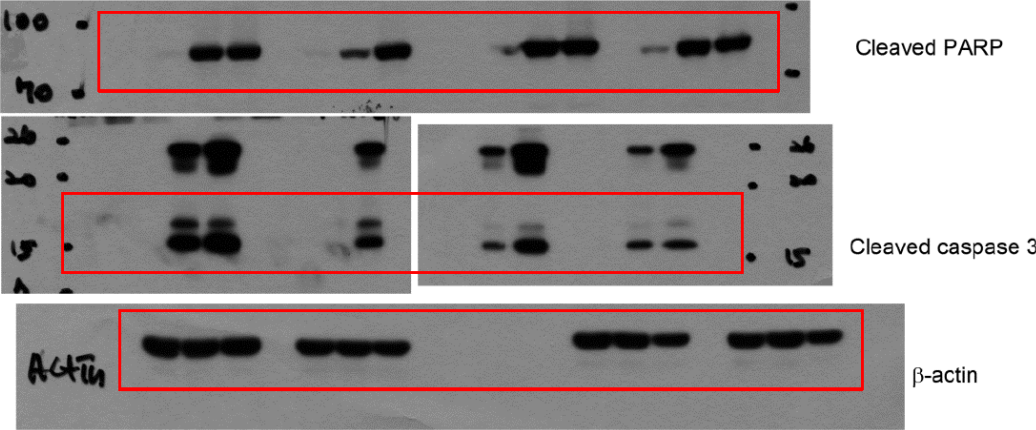

Full blots for figure 4b, c and f

4b

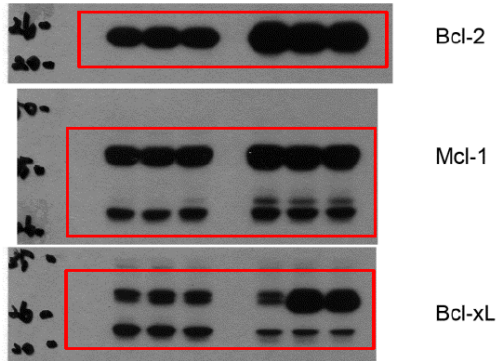

4c

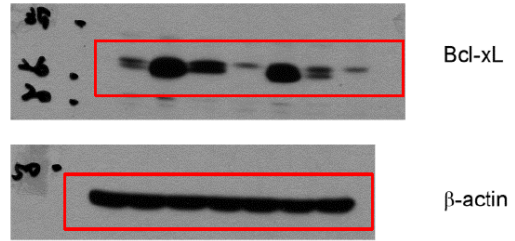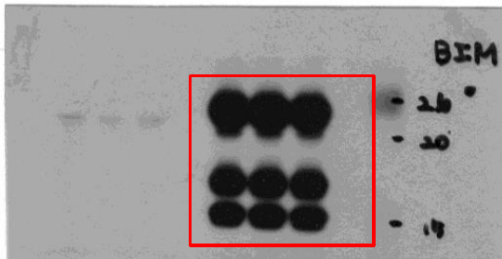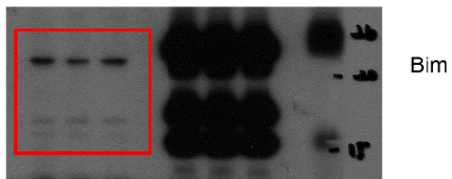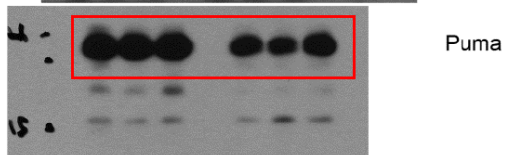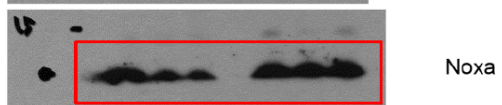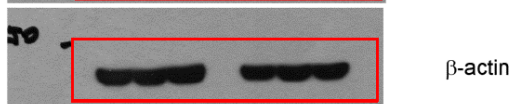



4f

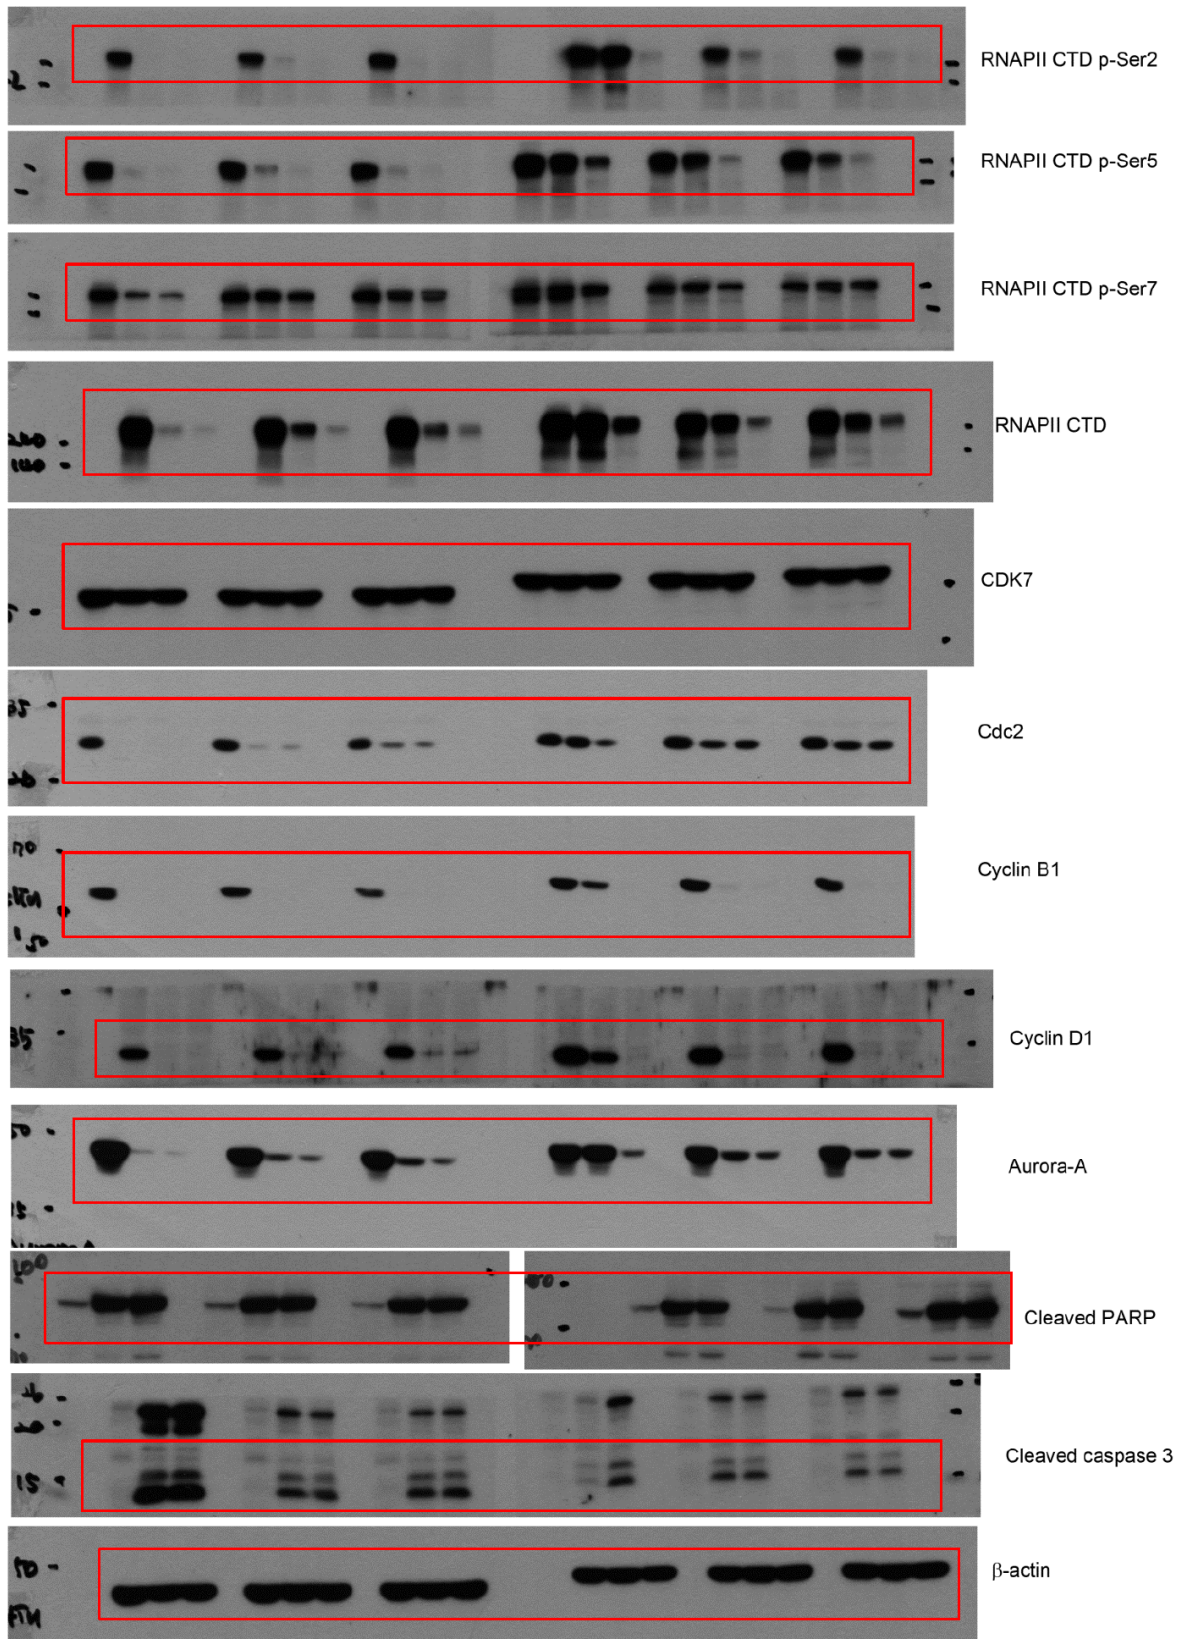

Full blots for figure 5b

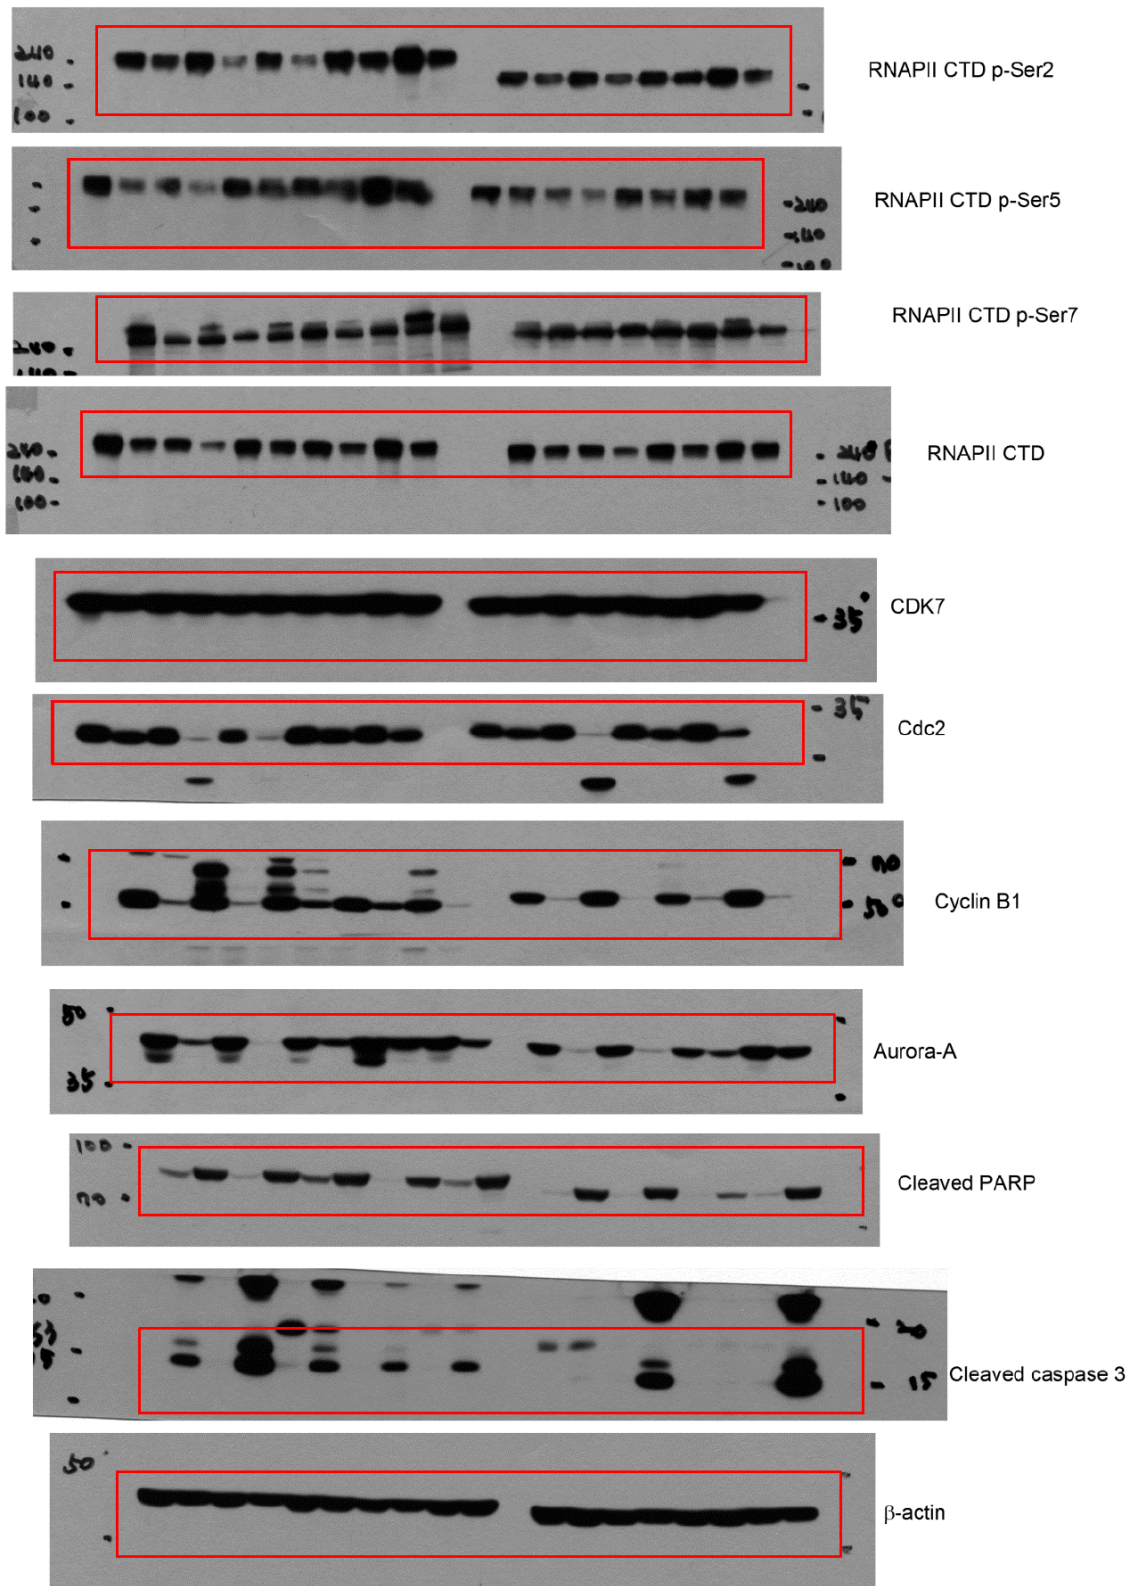

Full blots for supplemental figure S1

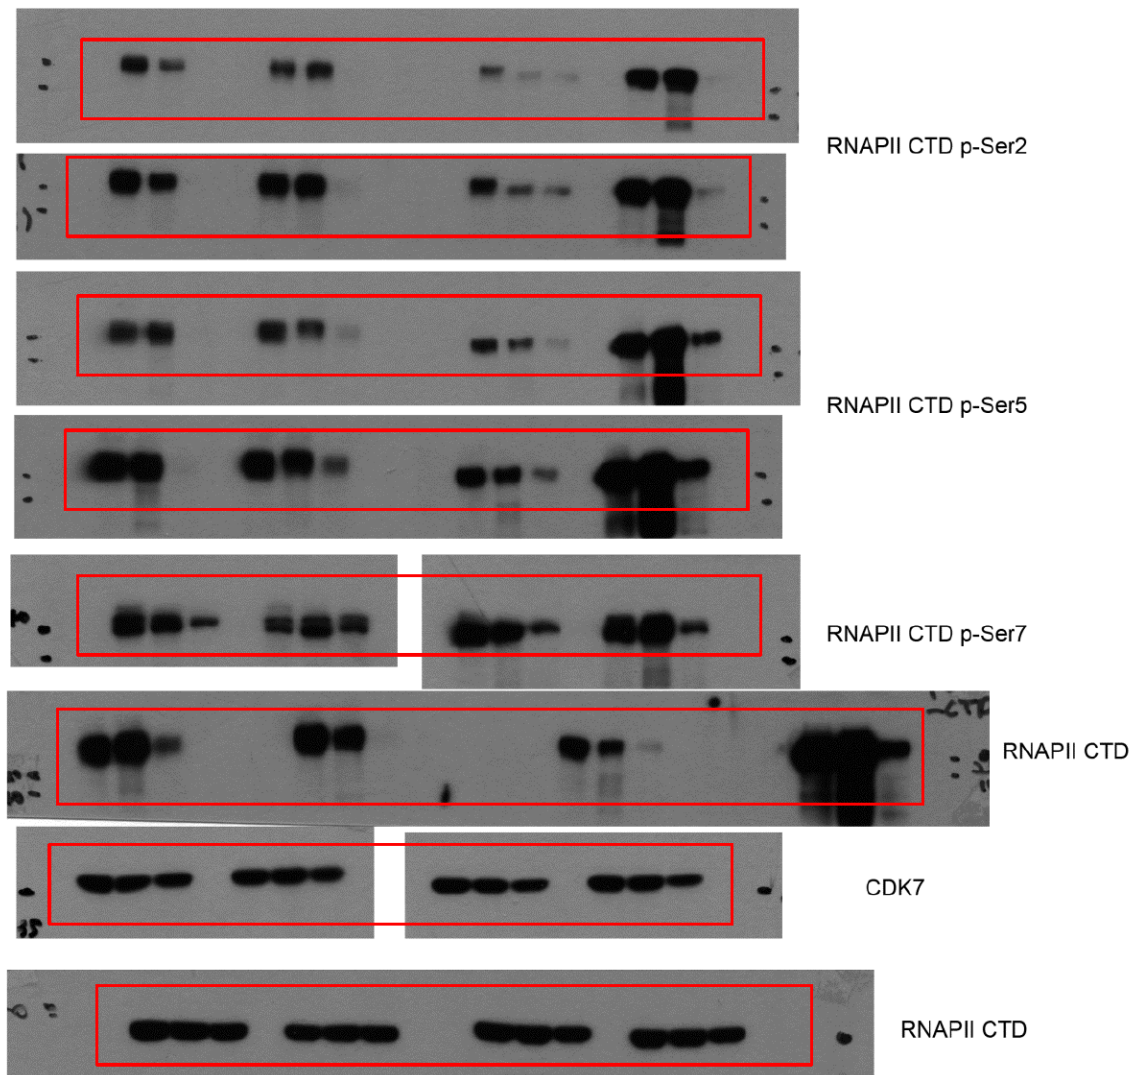

Full blots for supplemental figure S3

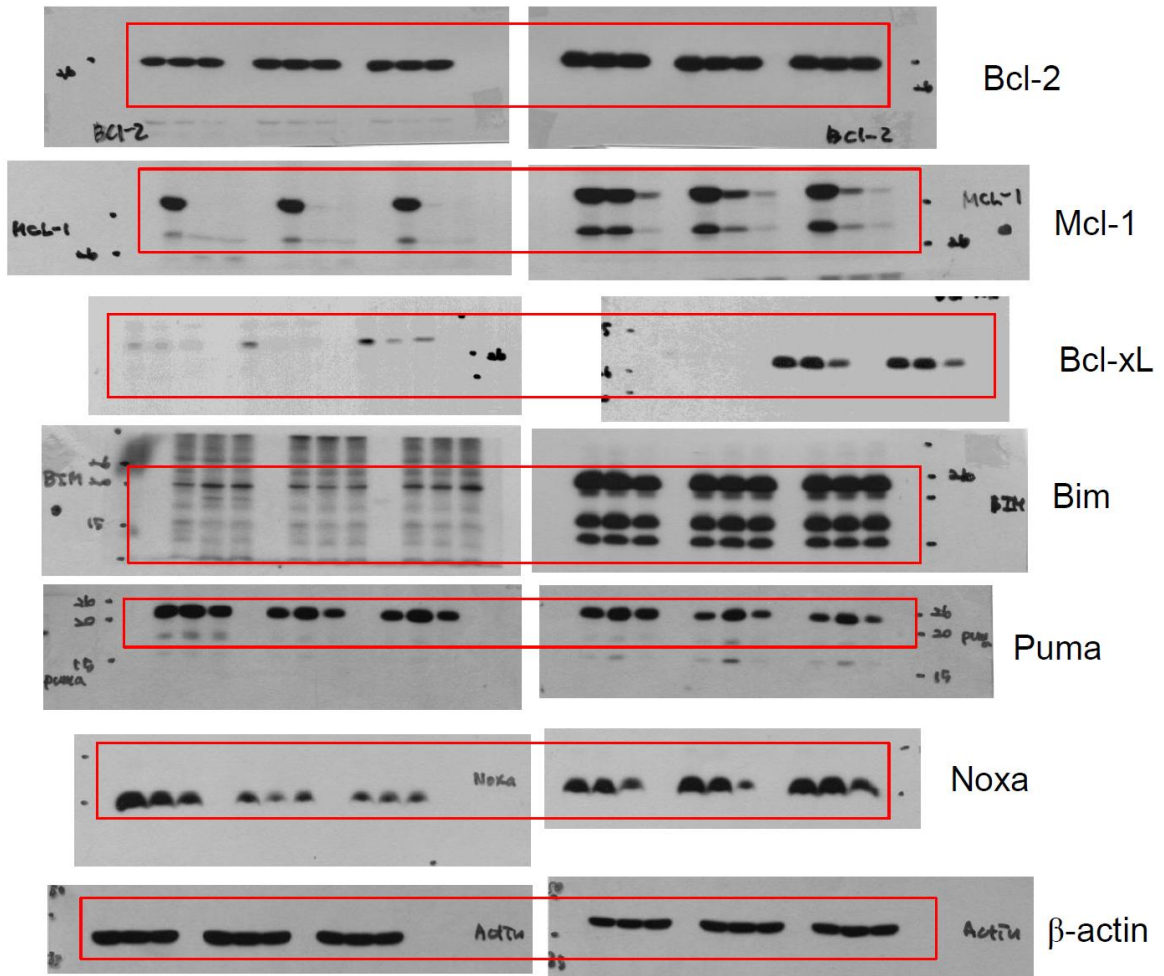

Supplement: 41598_2019_43760_MOESM3_ESM.pdf [file 41598_2019_43760_MOESM3_ESM.pdf]
